# Supplementary material
Source: HighWire-hosted journal article supplement (https://bmjopen.bmj.com/content/15/3/e091217)
Supplement: inline-supplementary-material-1 [file inline-supplementary-material-1.pdf]

| Points | Patterns                                                                                           |
|--------|----------------------------------------------------------------------------------------------------|
| 0      | A-profile or up to 2 B-lines separated by regular pleural lines                                    |
| 1      | Three or more B-lines with or without small subpleural consolidation and a regular pleural line    |
| 2      | Coalescent B-lines and or small subpleural consolidation with an irregular pleural line in between |
| 3      | Extensive subpleural consolidation is more than 1x2 cm                                             |

**Table.1** Modified lung ultrasound score
